# Supplementary material
Source: bioRxiv or medRxiv preprint supplement (https://www.biorxiv.org/highwire/filestream/137405/field_highwire_adjunct_files/0/428987-1.pdf)
Supplement: Supplementary file [file 428987-1.pdf]

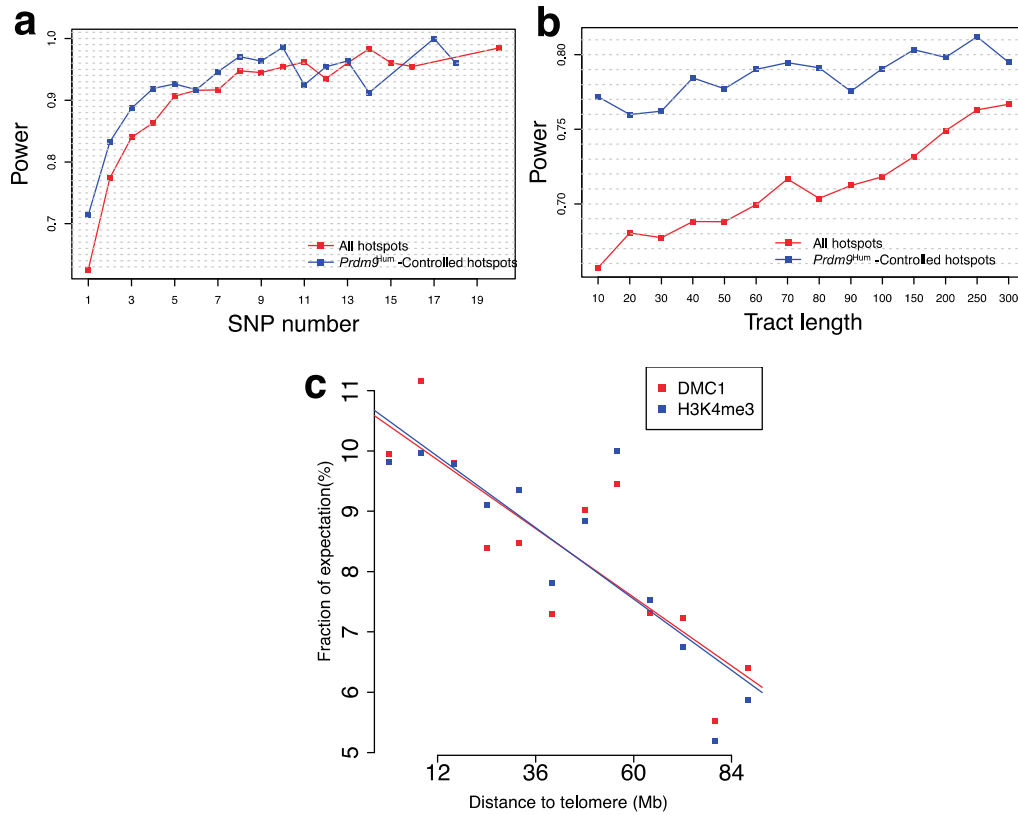

**Supplementary Fig. 1** Estimation of power to detect NCO events. Simulations with increasing number of converted sites (**a**) or mean tract length (**b**). Red line: power to detect events in F2 mice, Blue line: power to detect human-controlled events in F5 mice. **c** Fraction of total DMC1/H3K4me3 signal coming from bins of genomic regions at different distances to the telomere (x-axis). Full resolution available at:

<https://figshare.com/s/bf883f746fd676f1edb4>

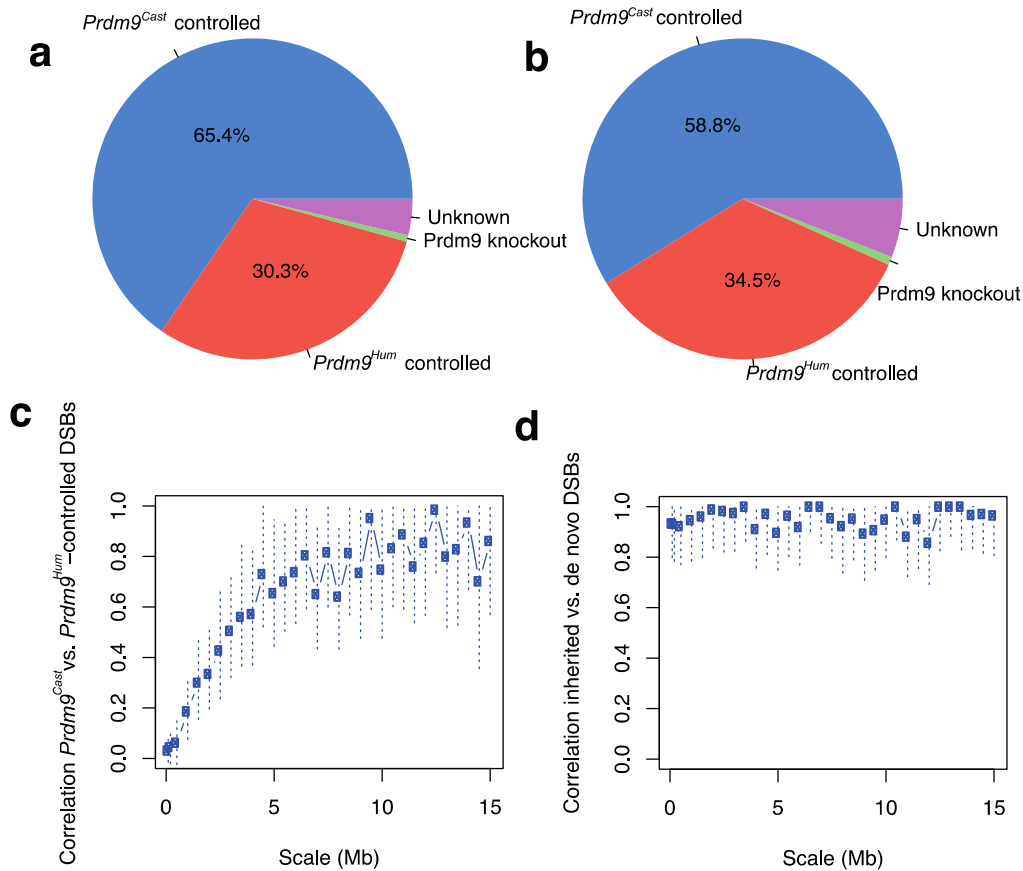

**Supplementary Fig. 2** Allelic dominance and broad-scale patterns. DMC1 (**a**) and H3K4me3 (**b**) signals at hotspots partitioned according to the controlling *Prdm9* allele. **c** Estimated underlying correlation between *Prdm9<sup>Cast</sup>*-controlled recombination events and *Prdm9<sup>Hum</sup>*-controlled recombination events at different scales. Details are as for Fig. 2g. **d** Correlation between inherited recombination events and *de novo* recombination events at different scales, as for **c**. Full resolution available at:

<https://figshare.com/s/bf883f746fd676f1edb4>

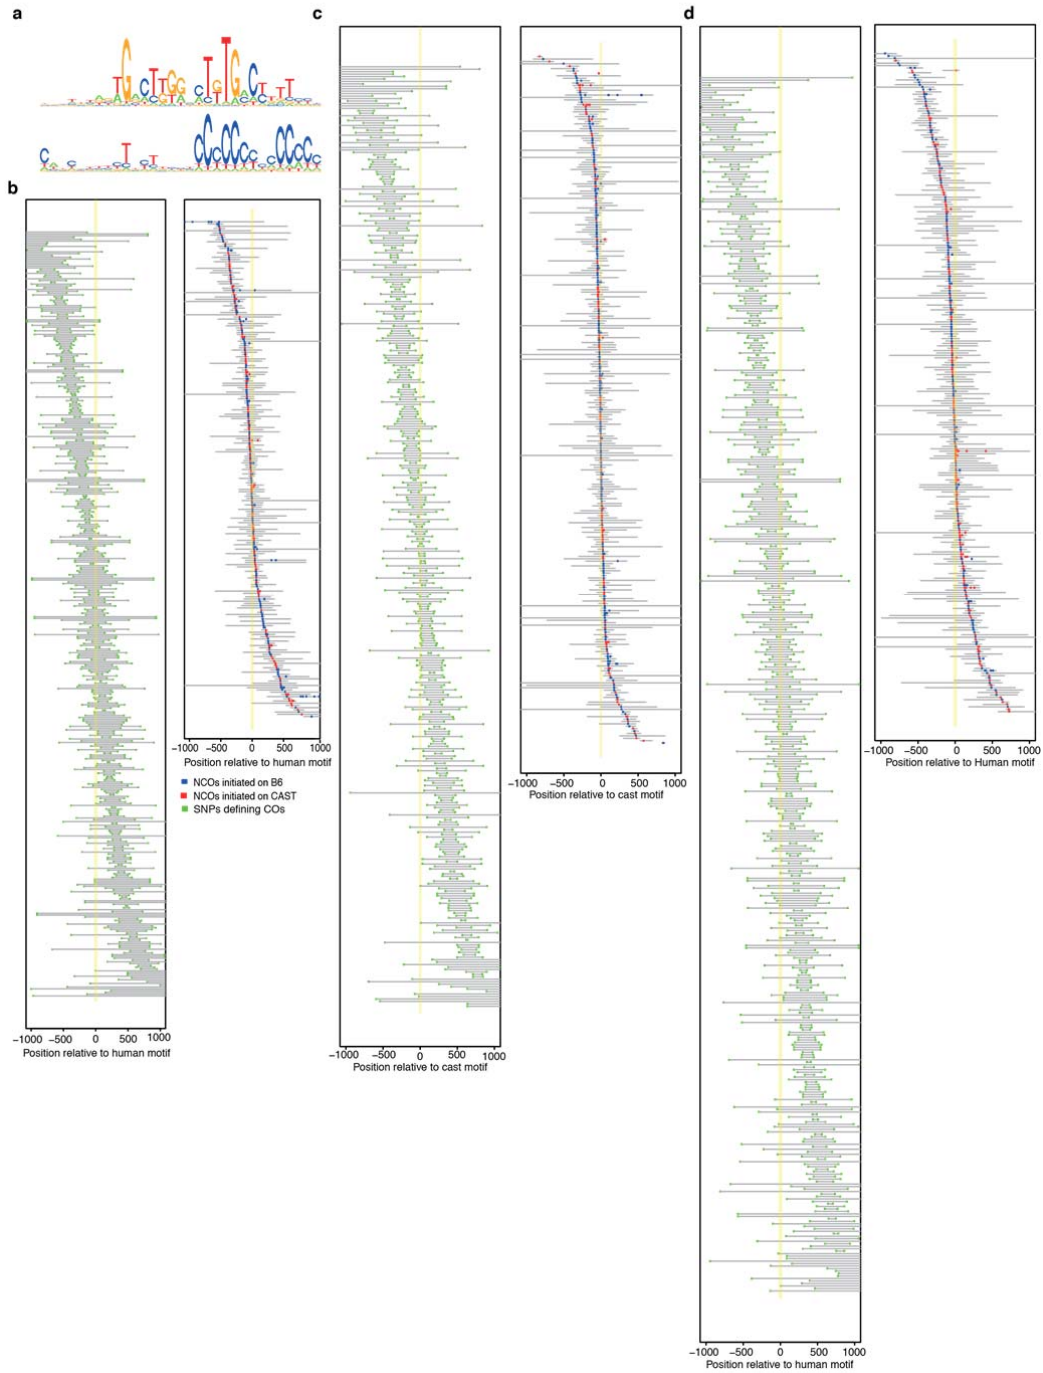

**Supplementary Fig. 3** NCOs and COs distribute around PRDM9 binding motifs. **a**

Distinct PRDM9 motifs identified, and their locations, within 97% of hotspots

controlled by  $Prdm9^{Cast}$  (top) and 74% of  $Prdm9^{Hum}$  hotspots (bottom). Distribution of F5 *de novo* (**b**) and inherited (**c-d**) COs (left) and NCOs (right) controlled by  $Prdm9^{Cast}$  (**c**) or  $Prdm9^{Hum}$  (**d**) around the PRDM9<sup>Hum</sup> (**b, d**) or PRDM9<sup>Cast</sup> (**c**) binding motifs. Full resolution available at: <https://figshare.com/s/bf883f746fd676f1edb4>

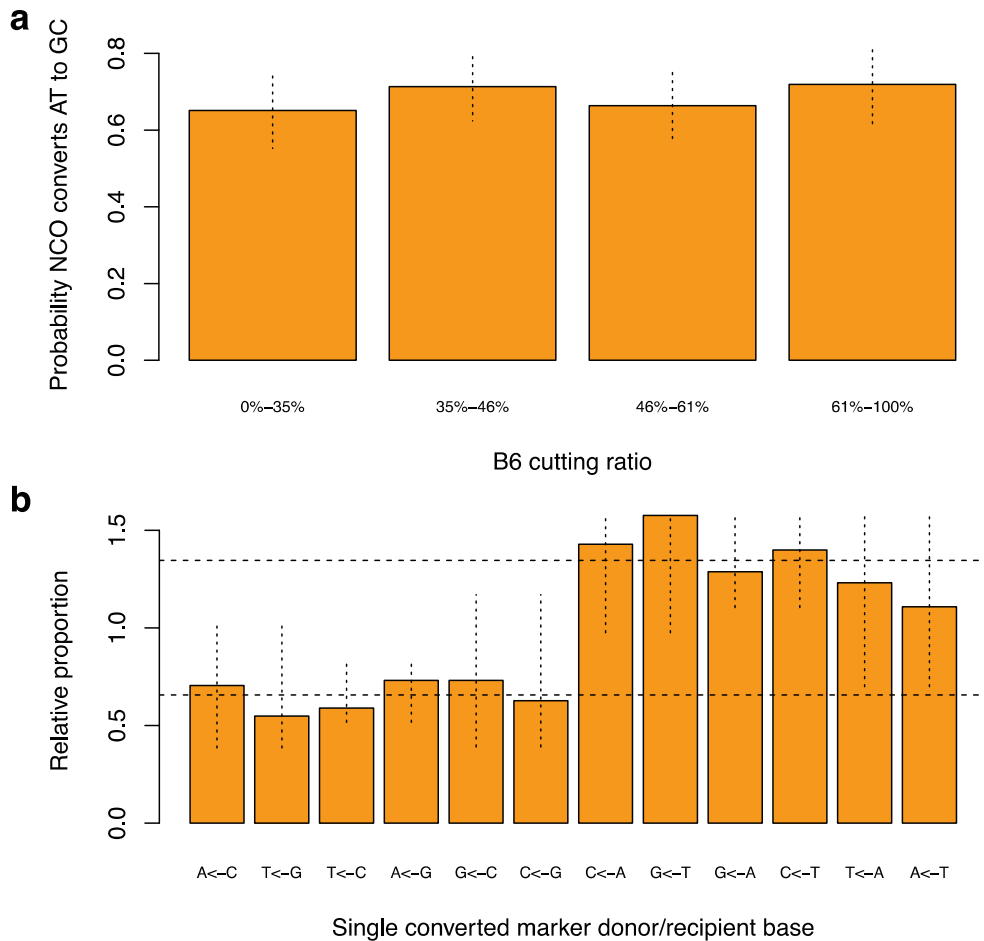

**Supplementary Fig. 4** GC-bias occurs independently of hotspot symmetry. **a** GC-bias (y-axis) in hotspots with different fractions of reads coming from B6 (x-axis). **b** For each of the 12 possible combinations of NCO donor/recipient alleles (x-axis; e.g. A<-C converts recipient C to donor A), the proportion of observed single-SNP NCOs of that type is plotted, relative to the corresponding proportion for all SNPs within observed multiple-SNP NCOs. Vertical lines: 95% CIs after pooling strand-equivalent pairs (e.g. A<-C and T<-G). Horizontal dotted lines: mean relative proportions for NCO events whose recipient types are G/C or A/T respectively. Full resolution available at: <https://figshare.com/s/bf883f746fd676f1edb4>

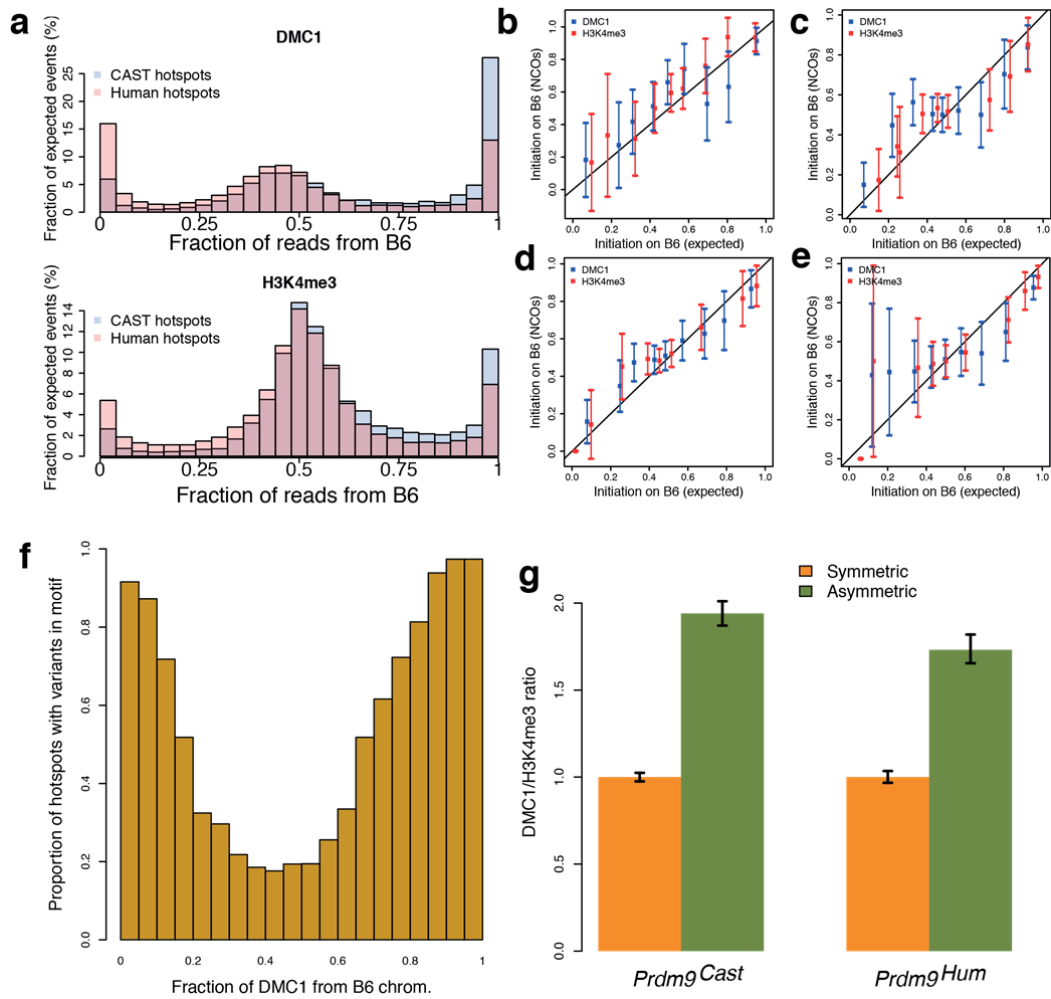

**Supplementary Fig. 5** Asymmetric hotspot properties. **a** Proportion of DMC1/H3K3me3 reads coming from hotspots binned according to the bias in chromosome-informative reads towards the B6 chromosome (100%: all reads from B6). *Prdm9<sup>Hum</sup>*-controlled and *Prdm9<sup>Cast</sup>*-controlled hotspots are shown separately. **b-e** NCOs were binned according to their predicted (H3K4me3 or DMC1) B6 cutting ratio, and expected (x-axis) versus observed (y-axis) fraction of events initiating on B6 are plotted. Vertical lines: 95% CIs. Plots show events from **(b)** F2, **(c)** F5 *de novo* events, **(d)** F5 inherited events controlled by *Prdm9<sup>Hum</sup>* and **(e)** F5 inherited events controlled by *Prdm9<sup>Cast</sup>*. **f** For hotspots binned according to the fraction of DMC1

reads from the B6 chromosome (x-axis), the fraction containing SNP/indel variants within the PRDM9 binding motif (y-axis). **g** Genome-wide autosomal ratio of mean DMC1 heat to mean H3K4me3 enrichment for asymmetric hotspots (fraction of reads from B6 chromosome is either larger than 0.95 or smaller than 0.05) relative to symmetric hotspots (fraction of reads from B6 chromosome is larger than 0.4 and smaller than 0.6) in both *Prdm9<sup>Hum</sup>* and *Prdm9<sup>Cast</sup>*-controlled hotspots. Error bars: 95% bootstrap CIs for the ratio of means. Full resolution available at: <https://figshare.com/s/bf883f746fd676f1edb4>

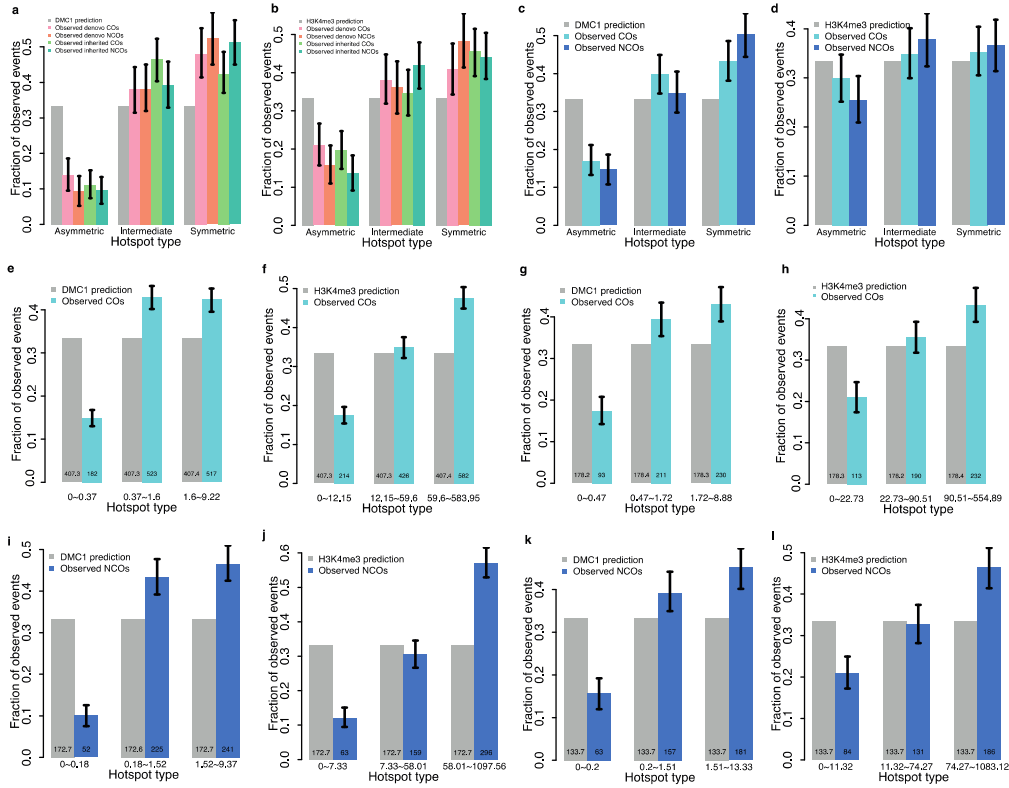

**Supplementary Fig. 6** Recombination events avoid asymmetric hotspots. **a**

*Prdm9<sup>Hum</sup>*-controlled hotspots are binned by their symmetry (Supplementary Note) into “asymmetric”, “intermediate” and “symmetric” hotspots, so each bin has the same expected number of events according to DMC1 heat. Grey bars: expected event fraction in bins from DMC1 heat. Coloured bars: observed number of (re-sampled) events in each bin, in labelled categories *de novo* COs from F5, *de novo* NCOs, inherited COs controlled by *Prdm9<sup>Hum</sup>* and inherited NCOs controlled by *Prdm9<sup>Hum</sup>*. Vertical lines: 95% bootstrapped confidence intervals. **b** As **a** except the binning and predicted events are calculated according to H3K4me3 heat. **c** As **a** but for recombination events controlled by *Prdm9<sup>Cast</sup>*, so there are no *de novo* F5 events. **d** As **c** except the predicted events are calculated according to H3K4me3 heat. **e-h** As **a-d** for CO events (no rejection sampling), now binning hotspots according to their average heats on the homologous chromosome, and for labelled alleles and measures



of hotspot heat (DMC1/H3K4me3). **e-f** show COs controlled by *Prdm9<sup>Hum</sup>* and **g-h** show COs controlled by *Prdm9<sup>Cast</sup>*. **i-l** As **e-h**, except for (all) NCO events, and now binning hotspots according to their heats on the homologous chromosome (Supplementary Note), because the initiating chromosome is identifiable for NCOs. **i-j** show NCOs controlled by *Prdm9<sup>Hum</sup>* and **k-l** show NCOs controlled by *Prdm9<sup>Cast</sup>*.

Full resolution available at: <https://figshare.com/s/bf883f746fd676f1edb4>

**Supplementary Table 1** Filters to identify true NCOs.

| Filter | Description                                                                                                                                                                                                                                       | Applied to   |
|--------|---------------------------------------------------------------------------------------------------------------------------------------------------------------------------------------------------------------------------------------------------|--------------|
| 1      | Remove sites that have read depth <20 in MGP version 4 data in B6 or CAST                                                                                                                                                                         | All sites    |
| 2      | Remove sites that have >1 alternative reads in B6 and sites that have >1 reference reads in CAST                                                                                                                                                  | All sites    |
| 3      | Remove sites called heterozygous in any of the 28 strains of mice in the MGP data                                                                                                                                                                 | All sites    |
| 4      | Remove sites shared by >2 F2 animals                                                                                                                                                                                                              | All sites    |
| 5      | Remove sites such that within 500bp there are >28 reads whose mate pairs map (insert size) >1kb away                                                                                                                                              | All sites    |
| 6      | Removed sites covered by less than 10 good reads*                                                                                                                                                                                                 | All sites    |
| 7      | Remove sites that are called different by Platypus version 0.7.9.1                                                                                                                                                                                | All sites    |
| 8      | Remove sites that have read depth >95% quantile for the sample                                                                                                                                                                                    | Heterozygous |
| 9      | Remove sites that have <3 good reference reads or <3 good alternative reads                                                                                                                                                                       | Heterozygous |
| 10     | Remove sites that show allelic imbalance (>70% of reads agree with non-converted background)                                                                                                                                                      | Heterozygous |
| 11     | Remove sites if they have genotype quality (GQ) <30                                                                                                                                                                                               | Heterozygous |
| 12     | Remove sites that have no good reads from the alternative allele                                                                                                                                                                                  | Homozygous   |
| 13     | Remove sites where the nearby non-converted sites overlapping read pairs containing potential converted sites show allelic imbalance (potential allelic “dropout”)                                                                                | Homozygous   |
| 14     | After applying the above filters, remove sites if there are >2 sites filtered within 500bp, and the fraction of removed sites in this region (<500 bp) is >50%. Iterate this process until we don’t remove further sites (“guilt by association”) | All sites    |
| 15     | After step 14, recover potential converted sites <500bp from conversion events passing filters (avoid removal of genuine long or complex events by accidentally failing filters). Iterate until we don’t recover additional sites.                | All sites    |

\* “Good” reads are defined as reads whose mate pair is not mapped to other chromosomes, and with insert size  $\leq 1000$ bp.

For reads containing the converted site, this site is >5bp from any indel and >10bp from the end of the read. Most properly mapped read pairs comfortably satisfy the first condition; we found empirically that alignment artefacts for reads failing the second condition led to many miscalled NCO events.

**Supplementary Table 2** Summary of NCO/CO events overlapping DMC1 and/or H3K4me3 peaks.

| Datasets          | Total events | Overlap<br>DMC1 | Overlap<br>H3K4me3 | Overlap<br>either | Overlap<br>either (%) |
|-------------------|--------------|-----------------|--------------------|-------------------|-----------------------|
| F2 COs            | 295          | 272             | 271                | 282               | 95.6                  |
| F5 de-novo COs    | 821          | 646             | 690                | 728               | 88.7                  |
| F5 inherited COs  | 1384         | 1164            | 1196               | 1264              | 91.3                  |
| All COs           | 2500         | 2082            | 2157               | 2274              | 91.0                  |
| F2 NCOs           | 183          | 147             | 144                | 154               | 84.2                  |
| F5 de-novo NCOs   | 510          | 355             | 375                | 402               | 78.8                  |
| F5 inherited NCOs | 882          | 730             | 713                | 771               | 87.4                  |
| All NCOs          | 1575         | 1232            | 1232               | 1327              | 84.3                  |

**Supplementary Table 3** GC-bias in NCO events.

| NCOs             |              | AT to GC | GC to AT | Probability of AT to GC | P value |
|------------------|--------------|----------|----------|-------------------------|---------|
| Human controlled | All          | 554      | 366      | 0.60                    | 6.2e-10 |
|                  | F5 de-novo   | 261      | 160      | 0.62                    | 1.0e-07 |
|                  | F5 inherited | 270      | 195      | 0.58                    | 0.0006  |
| CAST controlled  | All          | 298      | 167      | 0.64                    | 1.3e-09 |
|                  | F5           | 218      | 111      | 0.66                    | 3.7e-09 |
|                  | F2           | 80       | 56       | 0.59                    | 0.048   |
| F5 de-novo       | Paternal     | 71       | 53       | 0.57                    | 0.1265  |
|                  | Maternal     | 56       | 42       | 0.57                    | 0.1888  |
|                  | Either       | 127      | 95       | 0.57                    | 0.0372  |

All events in this table overlap DMC1 hotspots. P-values are calculated via binomial two-sided tests.

**Supplementary Table 4** GC-bias for single-SNP versus multi-marker NCO events. See separate Excel sheet. As Supplementary Table 2, except NCO events are stratified according to whether they contain a single marker, or overlap multiple markers. Results show only human-controlled NCO events in F5 mice. In addition to Supplementary Table 3 categories, we stratify NCO events according to whether they occur in asymmetric vs. symmetric hotspots, strong or weak hotspots, or nearby versus distally from an identified PRDM9 binding motif. All categories show similar results, and GC-bias specific to single-SNP NCO events. We also reanalyse NCO events reported by Halldorsson *et al.* 2016 from human data and show an identical effect (last rows of the table).
